# Supplementary material for: Evaluating the impact of transmission mode, calibration level and farmer compliance in simulation models of paratuberculosis in dairy herds
Source: PubMed Central journal article supplement (PMC6002403; doi:10.1038/s41598-018-27518-7), 2018-06-14
Supplement: 41598_2018_27518_MOESM1_ESM.pdf [file 41598_2018_27518_MOESM1_ESM.pdf]

1 **Supplementary Information for**

2

3

4

5 **Evaluating the impact of transmission mode, calibration level and farmer compliance**  
6 **in simulation models of paratuberculosis in dairy herds**

7

Carsten Kirkeby<sup>1\*</sup>, Kaare Græsbøll<sup>1</sup>, Tariq Halasa<sup>1</sup>

8

9

<sup>1</sup> National Veterinary Institute, Technical University of Denmark, Kemitorvet, 2800 Lyngby, Denmark

10

\* Correspondence to: [ckir@vet.dtu.dk](mailto:ckir@vet.dtu.dk)

11

12

13  
14  
15  
16  
17

Table S1. Probabilities, durations of periods and prices used in the model. Durations (except for calthood) are described by  $N(x, sd)$ , a normal distribution around the mean  $x$  with the standard deviation  $sd$ . All prices are in EUR. This table is duplicated from Kirkeby et al. [13].

| Parameter                      | Default value | Explanation                                                            | Reference                                                      |
|--------------------------------|---------------|------------------------------------------------------------------------|----------------------------------------------------------------|
| Heat Detection (Cow)           |               | 0.36 Probability of detecting heat (cows) (per heat period)            | (Ancker et al., 2009)                                          |
| Pregnancy Probability (Cow)    |               | 0.42 Probability of pregnancy (cows) (per insemination)                | (Ancker et al., 2009)                                          |
| Heat Detection (Heifer)        |               | 0.60 Probability of detecting heat (heifers) (per heat period)         | (Ancker et al., 2009)                                          |
| Pregnancy Probability (Heifer) |               | 0.55 Probability of pregnancy (heifers) (per insemination)             | (Ancker et al., 2009)                                          |
| Days Calf                      |               | 365 Number of days spent as a calf                                     | Expert opinion                                                 |
| Days Heifer                    | $N(110, 2)$   | Number of days spent as a heifer                                       | Expert opinion                                                 |
| Days Inseminated Heifer        | $N(41, 2)$    | Number of days to spend as inseminated heifer                          | Expert opinion: Pregnancy can be tested after 41 days.         |
| Days Pregnancy Heifer          | $N(280, 2)$   | Number of days to spend as pregnant heifer                             | Expert opinion                                                 |
| Days Milk Cow                  | $N(21, 2)$    | Number of days to spend as a lactating cow between inseminations       | Expert opinion                                                 |
| Days Post Calving              | $N(40, 2)$    | Number of days spent as a cow between calving and insemination         | Expert opinion                                                 |
| Days Inseminated Cow           | $N(41, 2)$    | Number of days spent as inseminated cow                                | Expert opinion: Pregnancy can be tested after 41 days.         |
| Days Pregnancy Cow             | $N(224, 2)$   | Number of days spent as pregnant cow                                   | Expert opinion                                                 |
| Days Dry Cow                   | $N(56, 2)$    | Number of days spent as dry cow                                        | <a href="http://www.landbrugsinfo.dk">www.landbrugsinfo.dk</a> |
| Max Age                        | 3650          | Maximum age before a cow is culled                                     | Expert opinion                                                 |
| Price ECM                      | 0.313         | The income (EUR) of selling 1 kg ECM (mean of high and low milk price) | (Aes, 2009)                                                    |
| Feed Unit Cost                 | 0.133         | The cost (EUR) for one feed unit (Roughage)                            | (Aes, 2009)                                                    |
| EUR per Hour                   |               | 16 The cost (EUR) for one hour labor                                   | (Kudahl et al., 2011)                                          |
| Insemination Price             |               | 16.1 The cost (EUR) for one insemination                               | (Kudahl et al., 2007b)                                         |
| Destruction Price              |               | 64.8 The cost (EUR) for destroying one animal (Excl. VAT)              | <a href="http://www.daka.dk">www.daka.dk</a> (07/08/2014)      |
| ELISA price                    |               | 5.3 The cost (EUR) of one ELISA                                        | (Kudahl et al., 2007b)                                         |

Table S2. MAP-related parameters used in the simulation model. The columns show each parameter, the default value used in the simulations, an explanation of the implementation of the parameter, and the reference for the chosen value.  $N(x, sd)$  describes a normal distribution around the mean  $x$  with the standard deviation  $sd$ . Parameters names and default values used in the iCull model are described and explained. References are given in the right column. This table is duplicated from Kirkeby et al. [13].

| Parameter                   | Default value    | Explanation                                                                                                                        | Reference                           |
|-----------------------------|------------------|------------------------------------------------------------------------------------------------------------------------------------|-------------------------------------|
| Number of Farming machines  | 1                | Number of machines used in all farm sections                                                                                       |                                     |
| Number of Personnel         | 2                | Number of personnel working in all farm sections                                                                                   |                                     |
| Machine cross-contamination | 8%               | The amount of MAP shed within each farm section that is spread with machines                                                       | Expert opinion                      |
| Boot cross-contamination    | 1%               | The amount of MAP shed within each farm section that is spread with boots                                                          | Expert opinion                      |
| Force of Infection          | 0.00016          | The force of infection from environmental MAP (scaling parameter)                                                                  | Calibrated in the model             |
| Hygiene Level               | 1                | The hygiene level on the farm. Lower hygiene level will increase the infection pressure from environmental MAP (scaling parameter) | Default set to 1                    |
| Low Shedding                | 5%               | Level of shedding from infected and low shedding animals                                                                           | Expert opinion                      |
| High Shedding               | 20%              | Level of shedding from infected and high shedding animals                                                                          | Expert opinion                      |
| Affected Shedding           | 100%             | Level of shedding from infected and affected animals                                                                               | Expert opinion                      |
| Colostrum Risk              | 2%               | Daily risk of calf getting infected from colostrum from if not pasteurized (per calving)                                           | Calibrated in the model             |
| Wastemilk Risk              | 0.32%            | Daily risk of calf getting infected from wastemilk if not pasteurized (per calving)                                                | Calibrated in the model             |
| Calf Risk 1                 | 9%               | Risk of calf getting infected from infected and low shedding mother (per calving)                                                  | (Whittington and Windsor., 2009)    |
| Calf Risk 2                 | 9%               | Risk of calf getting infected from infected and high shedding mother (per calving)                                                 | (Whittington and Windsor., 2009)    |
| Calf Risk 3                 | 39%              | Risk of calf getting infected from infected and affected mother (per calving)                                                      | (Whittington and Windsor, 2009)     |
| Days State 3                | $N(1095, 109.5)$ | Number of days spent in the affected state if not culled. Affected cows are rendered after dying from disease                      | Expert opinion                      |
| Days State 2                | $N(365, 36.5)$   | Number of days spent in the high shedding state before being affected                                                              | Expert opinion                      |
| Days State 1                | $N(180, 18)$     | Number of days spent in the low shedding state before progressing to the high shedding state                                       | Expert opinion                      |
| Cutoff                      | $\geq 0.3$       | Cutoff used to identify a positive ELISA                                                                                           | ID Screen (IDvet, Graebels, France) |

Table S3. Initial properties of the simulated herd in the iCull model, showing the distribution of animals in each life stage in the initial herd. Par columns show the percentages of cows in parity 1, 2 and 3+, for each of the life steps. The initial herd is constructed to reflect a medium sized dairy herd with 200 cows. This table is duplicated from Kirkeby et al. [13].

| Parameter            | Distribution | No. animals | Par 1 | Par 2 | Par 3+ |
|----------------------|--------------|-------------|-------|-------|--------|
| Calves               | 27%          | 118         |       |       |        |
| Heifers              | 10%          | 44          |       |       |        |
| Inseminated heifers  | 1%           | 4           |       |       |        |
| Pregnant heifers     | 18%          | 79          |       |       |        |
| Early lactation cows | 7%           | 30          | 57%   | 30%   | 13%    |
| Inseminated cows     | 7%           | 30          | 30%   | 43%   | 27%    |
| Pregnant cows        | 25%          | 110         | 43%   | 26%   | 31%    |
| Dry cows             | 7%           | 30          | 53%   | 23%   | 24%    |

1 Table S4. Mortalities and stillbirth rates used in the model. This table is duplicated from Kirkeby et al. [13].

| Parameter  | Default value | Explanation                              | Reference                                         |
|------------|---------------|------------------------------------------|---------------------------------------------------|
| death0     | 0.065         | Yearly mortality for calves              | Expert opinion                                    |
| death1     | 0.035         | Yearly mortality for heifers             | Estimated to be between 3.2 and 3.7% (SEGES 2015) |
| death2     | 0.05          | Yearly mortality for inseminated heifers | Expert opinion                                    |
| death3     | 0.05          | Yearly mortality for pregnant heifers    | Expert opinion                                    |
| death4     | 0.05          | Yearly mortality for milking cows        | Expert opinion                                    |
| death5     | 0.05          | Yearly mortality for inseminated cows    | Expert opinion                                    |
| death6     | 0.05          | Yearly mortality for pregnant cows       | Expert opinion                                    |
| death7     | 0.05          | Yearly mortality for dry cows            | Expert opinion                                    |
| Stillbirth | 0.04          | Risk of stillbirth per calving           | Expert opinion                                    |

2

3

4 Table S5. The Numbers of herds with one to 22 records in the field data.

| No. of records | No. Of herds |
|----------------|--------------|
| 3              | 8            |
| 4              | 6            |
| 5              | 7            |
| 6              | 4            |
| 7              | 10           |
| 8              | 4            |
| 9              | 5            |
| 10             | 4            |
| 11             | 4            |
| 12             | 4            |
| 13             | 5            |
| 14             | 9            |
| 15             | 6            |
| 16             | 7            |
| 17             | 10           |
| 18             | 25           |
| 19             | 62           |
| 20             | 71           |
| 21             | 32           |
| 22             | 6            |

5

6

7 Table S6. Number of zero-estimates in the prevalence adjusted with the Rogan-Gladen estimator. All herds  
8 are in group 4.

| No. of sub-zero estimates in the Rogan-Gladen estimator | No. Of herds |
|---------------------------------------------------------|--------------|
| 0                                                       | 23           |
| 1                                                       | 31           |
| 2                                                       | 28           |
| 3                                                       | 9            |
| 4                                                       | 17           |
| 5                                                       | 12           |
| 6                                                       | 8            |
| 7                                                       | 7            |
| 8                                                       | 9            |
| 9                                                       | 14           |
| 10                                                      | 10           |
| 11                                                      | 9            |
| 12                                                      | 6            |
| 13                                                      | 3            |
| 15                                                      | 1            |
| 16                                                      | 2            |
| 17                                                      | 1            |

Test sensitivity as function of age

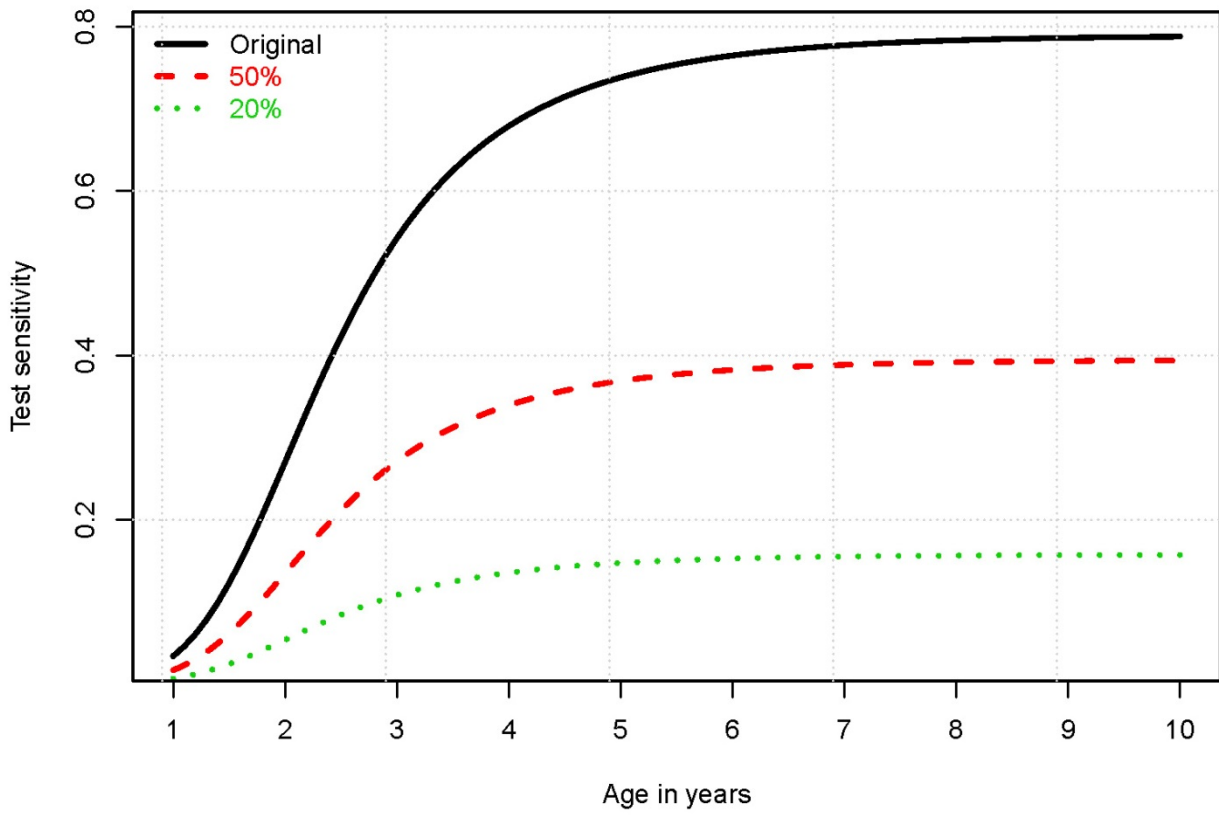

10

11 Figure S1. The test sensitivity as a function of the age of the tested animal. This figure shows the original  
12 used test sensitivity in the simulation model and the reduced versions at 50% and 20%.
